# Supplementary material
Source: Springer Nature journal article supplement (https://www.springermedizin.de/resource/supplementary/12879_2004_158_MOESM8_ESM.pdf/9448276)

**(a)**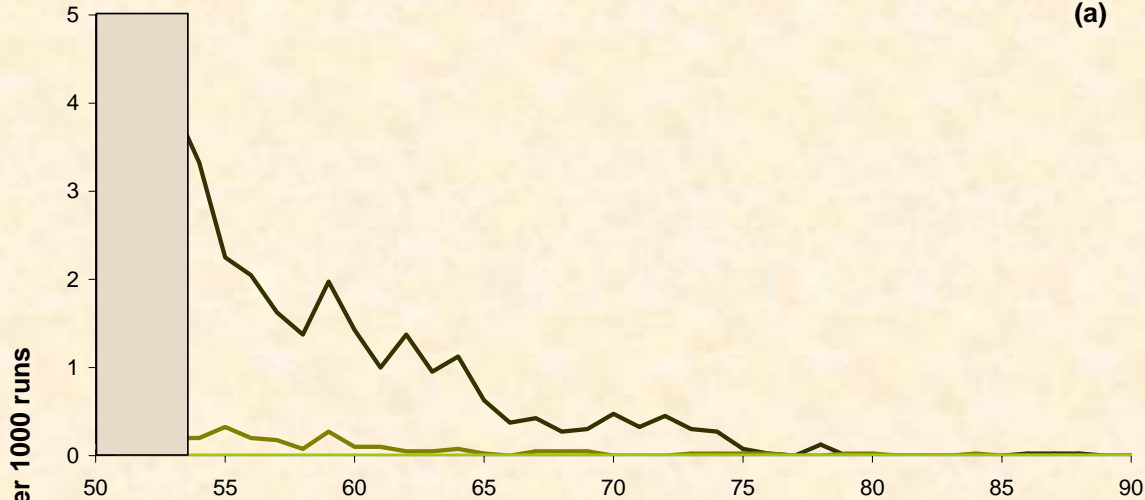**(b)**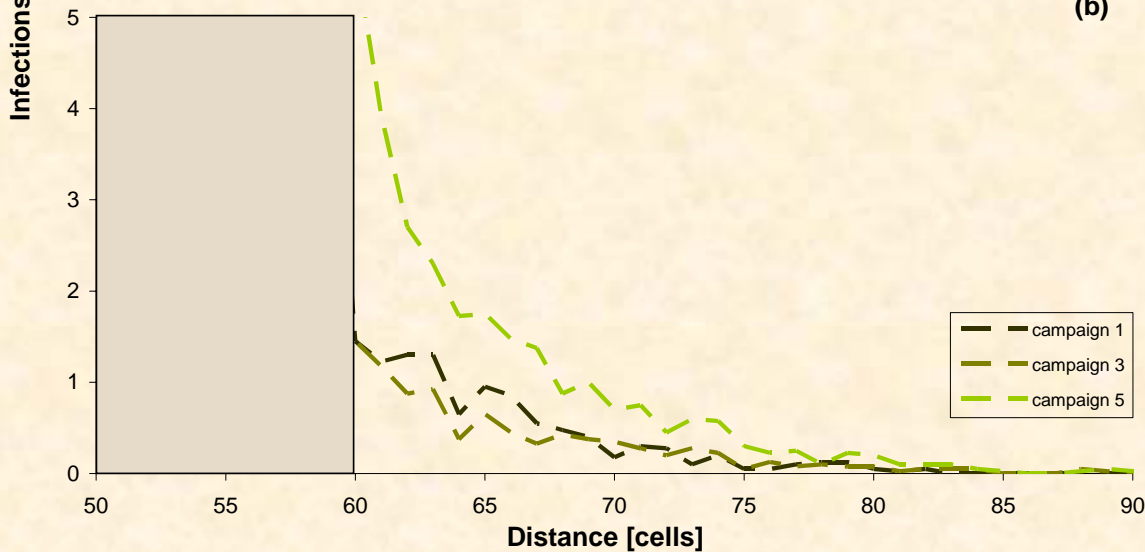

Supplement: MOESM8 [file 9448276]
